# Supplementary material for: Identification of SCN5a p.C335R Variant in a Large Family with Dilated Cardiomyopathy and Conduction Disease
Source: MDPI journal article supplement (doi:10.3390/ijms222312990), 2021-11-30

## Supplemental Figure Legend

**Supplemental Figure S1: Exercise-induced high grade atrioventricular (AV) block in patient with SCN5a C335R and TTNtv (IV.1).**

**Supplemental Figure S2 : Generated patient-specific induced pluripotent stem cells (iPSC) show full pluripotency characteristics (A-D).** Pluripotency characterization is shown exemplary for iPSC clones from patient IV.14. **A:** The iPSC exhibited typical round colony-forming stem cell morphology (left) and were positive for alkaline phosphatase activity (right). Scale bars: 200  $\mu\text{m}$ . **B:** The generated iPSC express pluripotency markers OCT4, SOX2, LIN28 and GDF3 on the mRNA level in similar amounts to an already published iPSC line (PC = positive control). Somatic cells like fibroblasts (FB) and mouse embryonic fibroblasts (MEF) are negative for expression of these pluripotency genes. GAPDH was used as a housekeeping gene. iPSC-IV.14 c1 and iPSC-IV.14 c2 represent iPSC clone 1 and 2 of patient IV.14. **C:** The iPSC cell lines express pluripotency markers on the protein level, which is visualized by immunofluorescent stainings against OCT4, SOX2, NANOG, LIN28 and TRA1-60. Scale bar: 100  $\mu\text{m}$ . **D:** In vitro embryoid body formation assay confirmed differentiation capacity into all three germ layers. Positive signals were obtained after immunofluorescent staining against endodermal marker AFP, mesodermal marker  $\alpha$ -SMA and ectodermal marker  $\beta$ -tubulin ( $\beta$ -TUB). Scale bars: 100  $\mu\text{m}$ .

# Supplemental Figure S1

before exercise

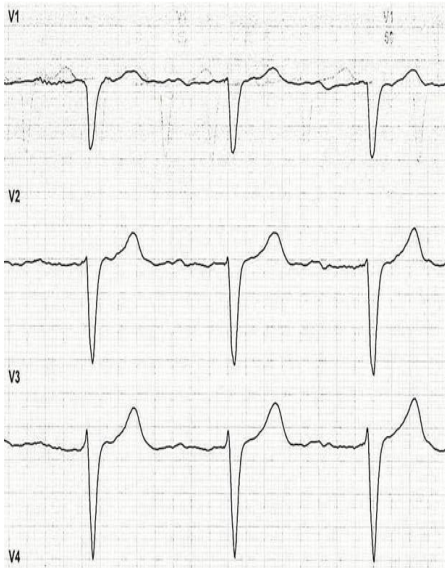

50 Watt

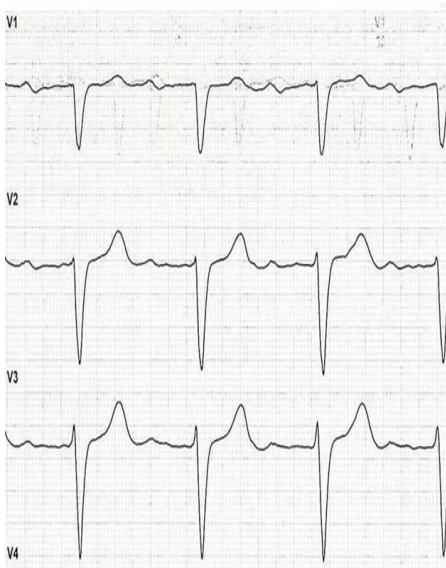

100 Watt

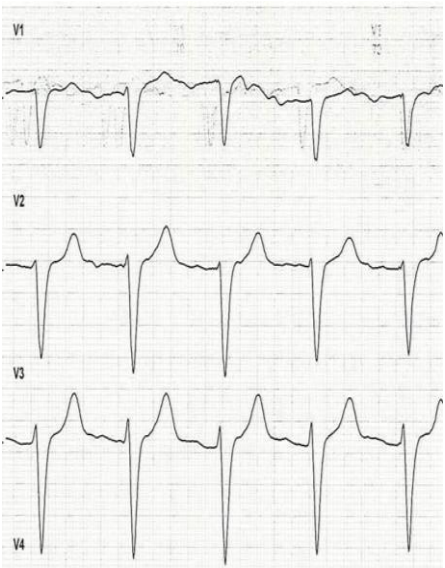

150 Watt

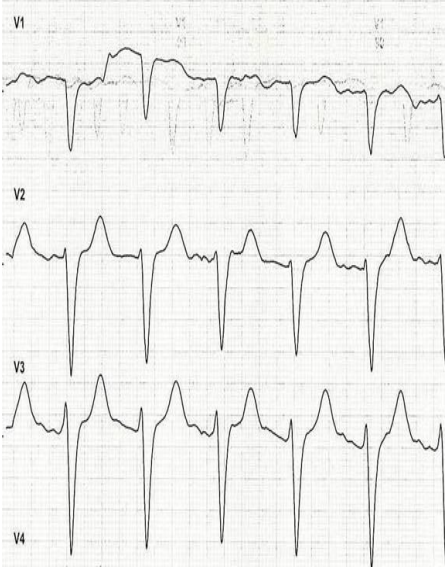

200 Watt

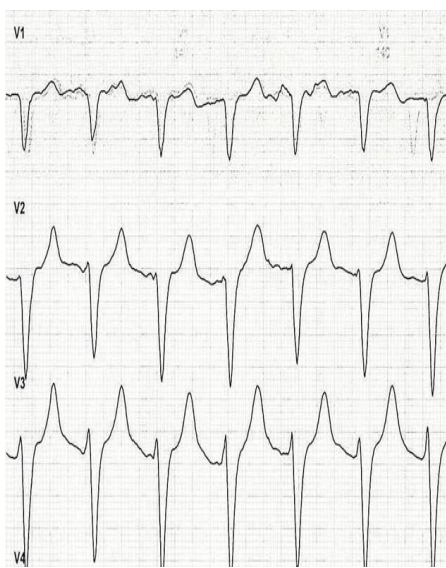

after exercise 25 Watt

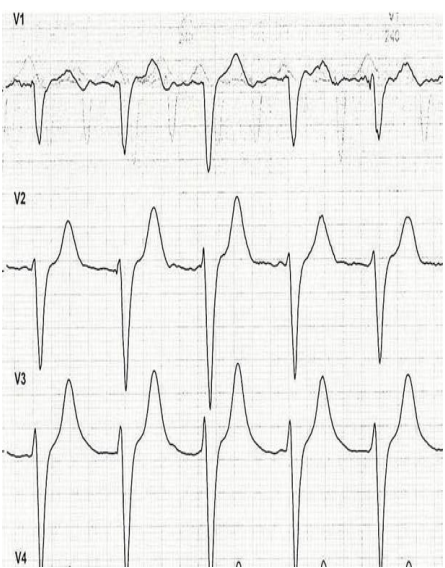

after exercise 25 Watt

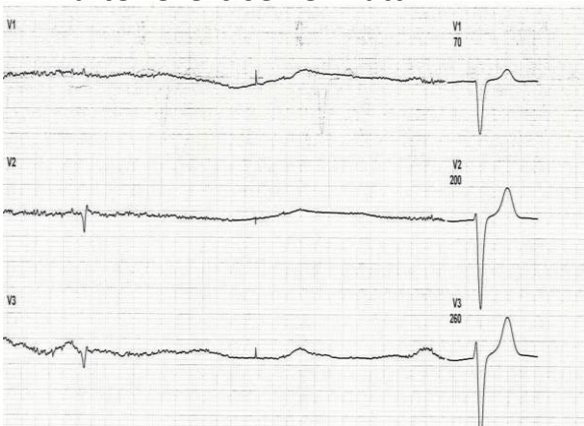

Supplemental Figure S2

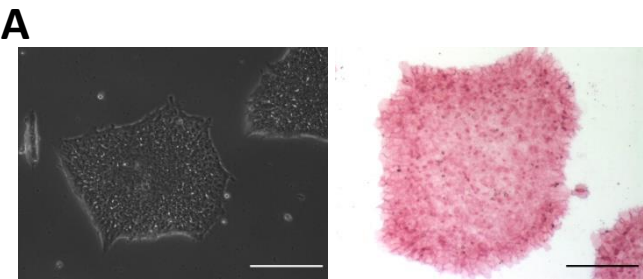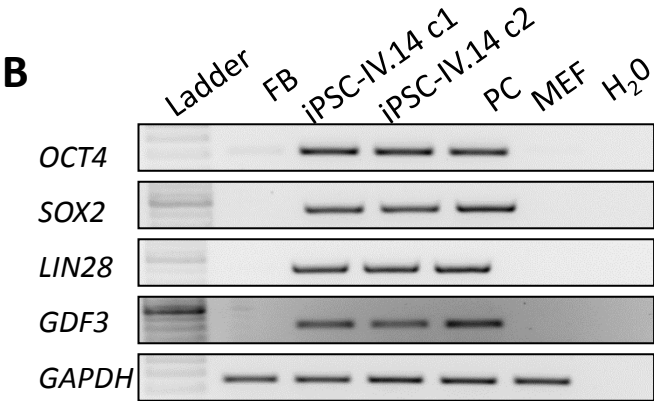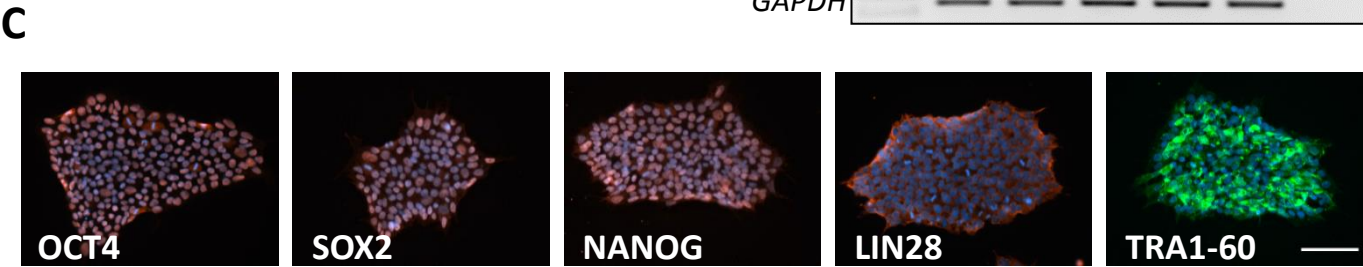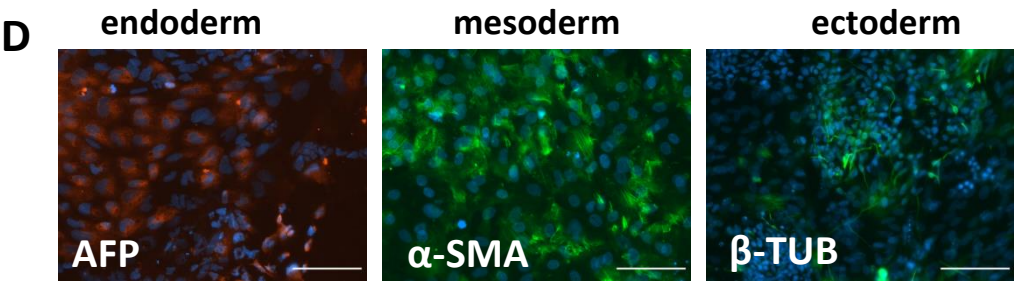

Supplement: s1 [file s1]
