# Supplementary material for: Identification of SCN5a p.C335R Variant in a Large Family with Dilated Cardiomyopathy and Conduction Disease
Source: MDPI journal article supplement (doi:10.3390/ijms222312990), 2021-11-30
Supplement: s1 [file s1]

**Supplemental Table S1:** List of variants

|   | Gene  | Position<br>(GRCh38) | Amino acid change    | HGVSc                                | ACMG classification*                    |
|---|-------|----------------------|----------------------|--------------------------------------|-----------------------------------------|
| 1 | SCN5A | chr3:38606806        | p.Cys335Arg          | SCN5A(NM_198056.3):c.1003T>C         | Likely Pathogenic (PM1;PM2;PP2;PP3;PP5) |
| 2 | TTN   | chr2:178571140       | p.Ser24998LysfsTer28 | TTN(NM_001267550.2):c.74987_74991dup | Pathogenic (PVS1;PM2;PP5;PP3)           |

**Supplemental Table S2:** Patient characteristic before and after CRT implantation

|         | Before CRT implantation |      |       |           |    |      |     | about 1 year After CRT implantation |      |       |           |    |      |     |
|---------|-------------------------|------|-------|-----------|----|------|-----|-------------------------------------|------|-------|-----------|----|------|-----|
| Patiens | EF                      | NYHA | LVEDD | NT-ProBNP | MR | 6MWT | QRS | EF                                  | NYHA | LVEDD | NT-ProBNP | MR | 6MWT | QRS |
| III.2   | NA                      | II   | NA    | NA        | NA | NA   | 220 | 15                                  | III  | 57    | 11293     | I° | 228  | 228 |
| III.3   | 38                      | II   | 57    | 812       | -  | 441  | 256 | 35                                  | II   | 56    | 1827      | I° | 463  | 223 |
| III.10  | 35                      | II   | 55    | 727       | I° | 422  | 212 | 35                                  | II   | 55    | 1825      | I° | 425  | 201 |
| III.14  | NA                      | II   | NA    | NA        | NA | NA   | 166 | 25                                  | II   | 58    | 834       | I° | NA   | 195 |

**Supplementary table S3:** The list of the genes for panel sequencing.

| gene    | ENSEMBL ID      |
|---------|-----------------|
| ABCC9   | ENSG00000069431 |
| ACTC1   | ENSG00000159251 |
| ACTN2   | ENSG00000077522 |
| ADRB1   | ENSG00000043591 |
| ADRB2   | ENSG00000169252 |
| ADRB3   | ENSG00000188778 |
| ANKRD1  | ENSG00000148677 |
| BAG3    | ENSG00000151929 |
| CACNA1C | ENSG00000151067 |

|               |                 |
|---------------|-----------------|
| <b>CACNB2</b> | ENSG00000165995 |
| <b>CALR3</b>  | ENSG00000269058 |
| <b>CASQ2</b>  | ENSG00000118729 |
| <b>CAV3</b>   | ENSG00000182533 |
| <b>CBFB</b>   | ENSG00000067955 |
| <b>CRYAB</b>  | ENSG00000109846 |
| <b>CSRP3</b>  | ENSG00000129170 |
| <b>CTF1</b>   | ENSG00000150281 |
| <b>DES</b>    | ENSG00000175084 |
| <b>DMD</b>    | ENSG00000198947 |
| <b>DSC2</b>   | ENSG00000134755 |
| <b>DSG2</b>   | ENSG00000046604 |
| <b>DSP</b>    | ENSG00000096696 |
| <b>EYA4</b>   | ENSG00000112319 |
| <b>GPD1L</b>  | ENSG00000152642 |
| <b>ILK</b>    | ENSG00000166333 |
| <b>JPH2</b>   | ENSG00000149596 |
| <b>JUNB</b>   | ENSG00000171223 |
| <b>JUP</b>    | ENSG00000173801 |
| <b>KCNE1</b>  | ENSG00000180509 |
| <b>KCNE2</b>  | ENSG00000159197 |
| <b>KCNH2</b>  | ENSG00000055118 |
| <b>KCNJ2</b>  | ENSG00000123700 |
| <b>KCNJ8</b>  | ENSG00000121361 |
| <b>KCNQ1</b>  | ENSG00000053918 |
| <b>KCNQ2</b>  | ENSG00000075043 |
| <b>LAMP2</b>  | ENSG00000005893 |
| <b>LDB3</b>   | ENSG00000122367 |
| <b>LIMS1</b>  | ENSG00000169756 |

|               |                 |
|---------------|-----------------|
| <b>LIMS2</b>  | ENSG00000072163 |
| <b>LMNA</b>   | ENSG00000160789 |
| <b>MYBPC3</b> | ENSG00000134571 |
| <b>MYH6</b>   | ENSG00000197616 |
| <b>MYH7</b>   | ENSG00000092054 |
| <b>MYL2</b>   | ENSG00000111245 |
| <b>MYL3</b>   | ENSG00000160808 |
| <b>MYOZ2</b>  | ENSG00000172399 |
| <b>MYPN</b>   | ENSG00000138347 |
| <b>NEXN</b>   | ENSG00000162614 |
| <b>PARVB</b>  | ENSG00000188677 |
| <b>PDLIM3</b> | ENSG00000154553 |
| <b>PKP2</b>   | ENSG00000057294 |
| <b>PLN</b>    | ENSG00000198523 |
| <b>PRKAG2</b> | ENSG00000106617 |
| <b>PSEN1</b>  | ENSG00000080815 |
| <b>PSEN2</b>  | ENSG00000143801 |
| <b>RBFOX1</b> | ENSG00000078328 |
| <b>RBM20</b>  | ENSG00000203867 |
| <b>RYR2</b>   | ENSG00000198626 |
| <b>SCN1B</b>  | ENSG00000105711 |
| <b>SCN4B</b>  | ENSG00000177098 |
| <b>SCN5A</b>  | ENSG00000183873 |
| <b>SGCD</b>   | ENSG00000170624 |
| <b>SMYD1</b>  | ENSG00000115593 |
| <b>SMYD2</b>  | ENSG00000143499 |
| <b>SNTA1</b>  | ENSG00000101400 |
| <b>TAZ</b>    | ENSG00000102125 |
| <b>TBX20</b>  | ENSG00000164532 |

|              |                 |
|--------------|-----------------|
| <b>TCAP</b>  | ENSG00000173991 |
| <b>TGFB3</b> | ENSG00000119699 |
| <b>TMPO</b>  | ENSG00000120802 |
| <b>TNNC1</b> | ENSG00000114854 |
| <b>TNNI3</b> | ENSG00000129991 |
| <b>TNNT2</b> | ENSG00000118194 |
| <b>TPM1</b>  | ENSG00000140416 |
| <b>TTN</b>   | ENSG00000155657 |
| <b>VCL</b>   | ENSG00000035403 |
